# Supplementary material
Source: publisher figshare collection journal article supplement (https://karger.figshare.com/articles/dataset/_/5121757)
Supplement: Supplementary file 1 [file 1]

Supplementary Table 1. Allometric Equations

|     |                                                         |
|-----|---------------------------------------------------------|
| EQ  | $EQ = w (brain) / Ew (brain)$                           |
| SNQ | $EN_{cx} = 2.39 \times 10^6 \times M_{body}^{23/50}$    |
| ENQ | $EN_{cx} = 33.47 \times 10^6 \times Mcx^{28/50}$        |
| SGQ | $EG_{cx} = 926.94 \times 10^3 \times M_{body}^{73/100}$ |
| EGQ | $EG_{cx} = 60.90 \times 10^6 \times M_{cx}^{89/100}$    |
| SNI | $SNI = En_{cx}$ (from SNQ) - estimated # of neurons     |
| ENI | $ENI = En_{cx}$ (from ENQ) - estimated # of neurons     |

Supplementary Table 2. F-test, p-values, Group Differences

|     | F             | Sig     | Group Differences (Tukey's HSD) |                        |
|-----|---------------|---------|---------------------------------|------------------------|
|     |               |         | W > L &                         |                        |
| SNQ | (2,25) 87.152 | < 0.001 | G                               |                        |
| ENQ | (2,25) 22.431 | < 0.001 | W > L > G                       |                        |
|     |               |         | W > L &                         |                        |
| SGQ | (2,25) 43.936 | < 0.001 | G                               |                        |
| EGQ | (2,25) 3.287  | 0.054   | W > G                           |                        |
|     |               |         | L < W &                         |                        |
| SNI | (2,25) 32.259 | < 0.001 | G                               |                        |
| ENI | (2,25) 7.495  | 0.003   | W > L                           | G > L (trend; p = .06) |

| Supplementary Table 3. Cellular Composition of Individual Cases |             |               |                   |                                |           |                          |                              |
|-----------------------------------------------------------------|-------------|---------------|-------------------|--------------------------------|-----------|--------------------------|------------------------------|
|                                                                 | Total cells | Total Neurons | Total Non-neurons | Non-Neuron/<br>Neuron<br>ratio | % Neurons | neuron density<br>per mg | Non-neuron<br>density per mg |
| Laboratory Norway Rat                                           |             |               |                   |                                |           |                          |                              |
| 09-99 LM V1                                                     | 2,605,469   | 886,968       | 1,718,501         | 1.94                           | 34.04     | 42,642                   | 82,620                       |
| 09-99 RM V1                                                     | 1,210,938   | 580,431       | 630,507           | 1.09                           | 47.93     | 20,655                   | 22,437                       |
| 09-100 LM V1                                                    | 2,777,344   | 1,117,956     | 1,659,388         | 1.48                           | 40.25     | 48,187                   | 71,525                       |
| 09-100 RM V1                                                    | 2,234,375   | 892,018       | 1,342,357         | 1.50                           | 39.92     | 40,000                   | 60,195                       |
| 09-104 LM V1                                                    | 2,550,781   | 1,002,753     | 1,548,028         | 1.54                           | 39.31     | 40,110                   | 61,921                       |
| 09-104 RM V1                                                    | 1,355,469   | 596,831       | 758,638           | 1.27                           | 44.03     | 32,613                   | 41,455                       |
| 09-105 LM V1                                                    | 1,195,313   | 550,443       | 644,870           | 1.17                           | 46.05     | 36,942                   | 43,279                       |
| 09-105 RM V1                                                    | 1,480,469   | 795,859       | 684,610           | 0.86                           | 53.76     | 31,581                   | 27,167                       |
| 09-118 LM V1                                                    | 2,781,250   | 1,174,530     | 1,606,720         | 1.37                           | 42.23     | 40,782                   | 55,788                       |
| 09-118 RM V1                                                    | 2,281,250   | 927,967       | 1,353,283         | 1.46                           | 40.68     | 51,268                   | 74,767                       |
| 09-119 LM V1                                                    | 1,500,000   | 647,117       | 852,883           | 1.32                           | 43.14     | 42,573                   | 56,110                       |
| 09-119 RM V1                                                    | 2,195,313   | 1,007,614     | 1,187,698         | 1.18                           | 45.90     | 43,060                   | 50,756                       |
| Mean                                                            | 2,013,997   | 848,374       | 1,165,624         | 1.37                           | 43.10     | 39,201                   | 53,123                       |
| SEM                                                             | 179,643     | 61,857        | 123,385           | 0.08                           | 1.44      | 2,333                    | 5,269                        |
| Wild-Caught Norway Rat                                          |             |               |                   |                                |           |                          |                              |
| 09-110 LM V1                                                    | 1,246,094   | 672,495       | 573,599           | 0.85                           | 53.97     | 56,041                   | 47,799                       |
| 09-110 RM V1                                                    | 2,347,656   | 1,040,387     | 1,307,269         | 1.26                           | 44.32     | 45,631                   | 57,336                       |
| 09-124 LM V1                                                    | 2,050,781   | 1,129,772     | 921,010           | 0.82                           | 55.09     | 70,610                   | 57,563                       |
| 09-124 RM V1                                                    | 1,890,625   | 903,884       | 986,741           | 1.09                           | 47.81     | 52,551                   | 57,368                       |
| 09-125 LM V1                                                    | 1,609,375   | 812,655       | 796,720           | 0.98                           | 50.50     | 46,974                   | 46,053                       |
| 09-125 RM V1                                                    | 1,347,656   | 679,219       | 668,438           | 0.98                           | 50.40     | 55,673                   | 54,789                       |
| 09-128 LM V1                                                    | 2,109,375   | 899,833       | 1,209,542         | 1.34                           | 42.66     | 59,199                   | 79,575                       |
| 09-128 RM V1                                                    | 3,144,531   | 1,438,918     | 1,705,614         | 1.19                           | 45.76     | 67,239                   | 79,701                       |
| 09-129 LM V1                                                    | 2,492,188   | 1,422,705     | 1,069,482         | 0.75                           | 57.09     | 61,856                   | 46,499                       |
| 09-129 RM V1                                                    | 2,632,813   | 1,206,269     | 1,426,544         | 1.18                           | 45.82     | 54,830                   | 64,842                       |
| Mean                                                            | 2,087,109   | 1,020,614     | 1,066,496         | 1.04                           | 49.34     | 57,060                   | 59,547                       |
| SEM                                                             | 187,695     | 87,726        | 111,468           | 0.06                           | 1.54      | 2,528                    | 3,887                        |
| Laboratory Nile Grass Rat                                       |             |               |                   |                                |           |                          |                              |
| Iowa 2 LM V1                                                    | 851,563     | 436,742       | 414,821           | 0.95                           | 0.51      | 50,200                   | 47,680                       |
| Iowa 2 RM V1                                                    | 1,001,953   | 555,558       | 446,395           | 0.80                           | 0.55      | 48,309                   | 38,816                       |
| Iowa 3 LM V1                                                    | 769,531     | 401,994       | 367,537           | 0.91                           | 0.52      | 36,215                   | 33,111                       |
| Iowa 3 RM V1                                                    | 808,594     | 424,155       | 384,439           | 0.91                           | 0.52      | 38,212                   | 34,634                       |
| Iowa 4 LM V1                                                    | 703,125     | 354,364       | 348,761           | 0.98                           | 0.50      | 38,517                   | 37,908                       |
| Iowa 4 RM V1                                                    | 708,984     | 357,230       | 351,755           | 0.98                           | 0.50      | 35,369                   | 34,827                       |
| Mean                                                            | 807,292     | 421,674       | 385,618           | 0.92                           | 0.52      | 41,137                   | 37,829                       |
| SEM                                                             | 45,386      | 30,127        | 15,684            | 0.03                           | 0.01      | 2,623                    | 2,156                        |
