# Supplementary material
Source: publisher figshare collection journal article supplement (https://karger.figshare.com/articles/dataset/_/5121757)
Supplement: Supplementary file 2 [file 1]

---

**Abbreviations used in the supplementary material of this paper**

---

|     |                              |
|-----|------------------------------|
| EGQ | encephalic glial quotient    |
| ENI | encephalic neuronal index    |
| ENQ | encephalic neuronal quotient |
| EQ  | encephalization quotient     |
| G   | Nile grass rat group         |
| L   | laboratory Norway rat group  |

|     |                              |
|-----|------------------------------|
| SGQ | somatic glial quotient       |
| SNI | somatic neuronal index       |
| SNQ | somatic neuronal quotient    |
| W   | wild-caught Norway rat group |

---
