# Supplementary material
Source: publisher figshare collection journal article supplement (https://karger.figshare.com/articles/dataset/_/5121757)
Supplement: Supplementary file 3 [file 1]

Archive with 3 entries (3 files):
- 000324862_sm_Abbreviations.pdf
- 000324862_sm_Figure.pdf
- 000324862_sm_Tables.pdf
