# Supplementary material
Source: publisher figshare collection journal article supplement (https://karger.figshare.com/articles/dataset/_/5121757)
Supplement: Supplementary file 3 [file 1 › 000324862_sm_Figure.pdf]

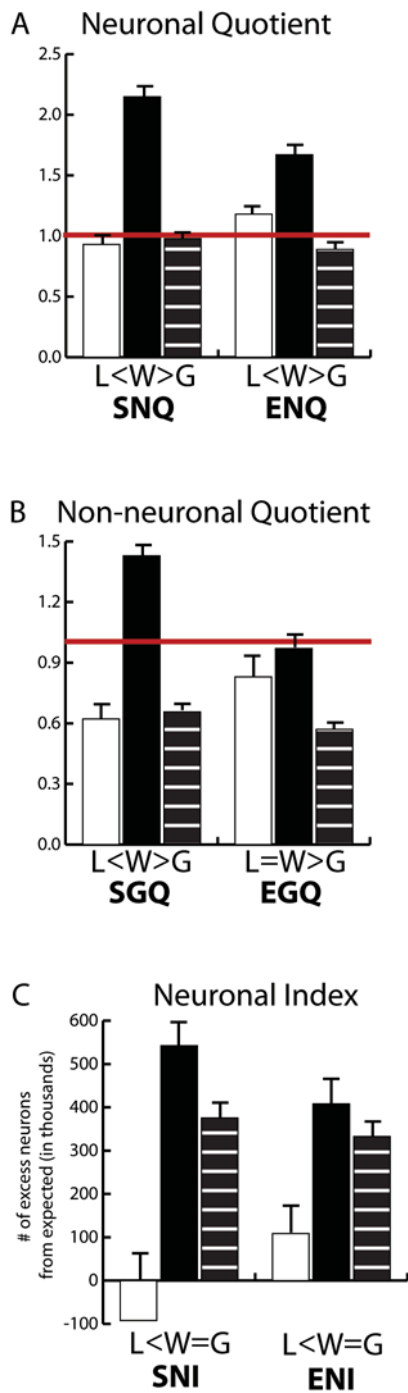

#### SUPPLEMENTARY FIGURE LEGEND

1. Histograms showing SNQ and ENQ (A), SGQ and EGQ (B), and SNI and ENI (C) for area 17 of each group. The x-axis for all histograms shows the rat group, and the y-axis for all histograms is a ratio. Laboratory Norway rats are represented by solid white bars. Wild-caught Norway rats are represented by solid black bars. Nile grass rats are represented by striped bars. Error bars represent the standard error of the mean. The horizontal line represents a ratio of 1. Significant differences between groups are indicated by the > or < symbol with abbreviations for each group beneath each histogram. L = laboratory Norway rat. W = wild-caught Norway rat. G = Nile grass rat.

Supplementary Figure 1
